# Supplementary material for: BMP and non-canonical Wnt signaling are required for inhibition of secondary tail formation in zebrafish
Source: Oxford University Press journal article supplement (doi:10.1242/dev.058404), 2011-05-24
Supplement: dev058404tables1.pdf [file dev058404tables1.pdf]

**Table S1. Penetrance of secondary tail in BMP mutants**

| Mutants | <i>smad5</i> <sup>m169</sup> | <i>smad5</i> <sup>dtly40/+</sup> , <i>smad5</i> <sup>dtly40/dtly40</sup> | <i>bmp7a</i> <sup>ty68a</sup> |
|---------|------------------------------|--------------------------------------------------------------------------|-------------------------------|
| 2° tail | 49% (n=84)                   | 36% (n=186)                                                              | 38% (n=95)                    |
