# Supplementary material for: BMP and non-canonical Wnt signaling are required for inhibition of secondary tail formation in zebrafish
Source: Oxford University Press journal article supplement (doi:10.1242/dev.058404), 2011-05-24
Supplement: dev058404tables2.pdf [file dev058404tables2.pdf]

**Table S2. Penetrance of secondary tail in embryos injected with *prickle1a*, *prickle 2b* and *strabismus* morpholinos (MOs)**

| MOs     | <i>pk1a</i> | <i>pk2b</i> | <i>stbm</i> | <i>pk1a+ pk2b</i> | <i>pk1a+ stbm</i> | <i>pk2b+ stbm</i> | <i>pk1a+ pk2b+stbm</i> |
|---------|-------------|-------------|-------------|-------------------|-------------------|-------------------|------------------------|
| 2° tail | 0% (n=70)   | 0% (n=82)   | 0% (n=79)   | 0% (n=75)         | 0% (n=69)         | 0% (n=84)         | 0% (n=77)              |
